# Supplementary material for: Ginsenoside Rb1 alleviated concanavalin A-induced hepatocyte pyroptosis by activating mitophagy
Source: Royal Society of Chemistry journal article supplement (doi:10.1039/d2fo03130b), 2023-01-01
Supplement: d2fo03130b1.pdf [file d2fo03130b1.pdf]

AST in mice serum

| Control     | ConA        | ConA+Rb1(25 mg/kg) | ConA+Rb1(50 mg/kg) |
|-------------|-------------|--------------------|--------------------|
| 16.5211125  | 83.80887684 | 74.33873727        | 36.28452167        |
| 18.48119249 | 79.77863489 | 83.80887684        | 38.29704892        |
| 18.48119249 | 81.37615637 | 78.20042767        | 36.28452167        |

| Control     | ConA        | ConA+Rb1    | ConA+Rb1+CsA |
|-------------|-------------|-------------|--------------|
| 19.5070601  | 96.63989046 | 41.43637114 | 82.18219195  |
| 19.8558906  | 95.74937519 | 44.16472048 | 94.86393174  |
| 23.15254081 | 99.34199518 | 27.15540938 | 99.34199518  |

ALT in mice  
serum

| Control     | ConA        | ConA+Rb1(25 mg/kg) | ConA+Rb1(50 mg/kg) |
|-------------|-------------|--------------------|--------------------|
| 14.0839214  | 153.9098816 | 137.7910621        | 17.9114402         |
| 14.34330365 | 172.7655136 | 168.5905968        | 18.20199428        |
| 13.57117037 | 168.5905968 | 156.5068008        | 19.088405          |

  

| Control     | ConA        | ConA+Rb1    | ConA+Rb1+CsA |
|-------------|-------------|-------------|--------------|
| 8.397724231 | 151.344605  | 15.40153899 | 143.8363635  |
| 10.65113421 | 153.9098816 | 17.05412956 | 155.2043717  |
| 10.88490117 | 153.9098816 | 16.4942653  | 142.6120489  |

IL-18 in cell supernatant

| Control     | ConA        | ConA+Rb1(6.25 $\mu$ M) | ConA+Rb1(12.5 $\mu$ M) |
|-------------|-------------|------------------------|------------------------|
| 131.0606061 | 426.5151515 | 346.2121212            | 287.1212121            |
| 149.2424242 | 458.3333333 | 371.969697             | 305.3030303            |
| 159.8484848 | 458.3333333 | 371.969697             | 305.3030303            |
| Control     | ConA        | ConA+Rb1               | ConA+Rb1+CsA           |
| 252.2727273 | 512.8787879 | 308.3333333            | 470.4545455            |
| 256.8181818 | 531.0606061 | 291.6666667            | 487.1212121            |
| 235.6060606 | 571.969697  | 338.6363636            | 423.4848485            |

IL-18 in mice serum

| Control     | ConA        | ConA+Rb1(25 mg/kg) | ConA+Rb1(50 mg/kg) |
|-------------|-------------|--------------------|--------------------|
| 20.45977011 | 151.4367816 | 125                | 47.4137931         |
| 23.85057471 | 138.7931034 | 114.0804598        | 59.48275862        |
| 27.29885057 | 128.4482759 | 91.09195402        | 62.93103448        |
| Control     | ConA        | ConA+Rb1           | ConA+Rb1+CsA       |
| 14.65517241 | 147.4137931 | 37.64367816        | 99.71264368        |
| 11.7816092  | 119.2528736 | 46.26436782        | 101.4367816        |
| 6.609195402 | 139.9425287 | 52.5862069         | 107.183908         |

IL-1 $\beta$  in cell supernatant

| Control     | ConA        | ConA+Rb1(6.25 $\mu$ M) | ConA+Rb1(12.5 $\mu$ M) |
|-------------|-------------|------------------------|------------------------|
| 104.1666667 | 166.1458333 | 155.7291667            | 122.9166667            |
| 95.3125     | 159.375     | 151.5625               | 123.9583333            |
| 93.22916667 | 169.7916667 | 156.7708333            | 116.6666667            |
| Control     | ConA        | ConA+Rb1               | ConA+Rb1+CsA           |
| 252.2727273 | 512.8787879 | 308.3333333            | 470.4545455            |
| 256.8181818 | 531.0606061 | 291.6666667            | 487.1212121            |
| 235.6060606 | 571.969697  | 338.6363636            | 423.4848485            |

IL-1 $\beta$  in mice serum

| Control     | ConA        | ConA+Rb1(25 mg/kg) | ConA+Rb1(50 mg/kg) |
|-------------|-------------|--------------------|--------------------|
| 12.8125     | 144.9553571 | 55.22321429        | 43.61607143        |
| 19.50892857 | 147.6339286 | 43.61607143        | 36.47321429        |
| 21.29464286 | 124.8660714 | 42.27678571        | 34.6875            |
| Control     | ConA        | ConA+Rb1           | ConA+Rb1+CsA       |
| 17.27678571 | 137.3660714 | 33.34821429        | 75.3125            |
| 22.63392857 | 128.8839286 | 34.6875            | 63.25892857        |
| 13.70535714 | 144.5089286 | 26.20535714        | 84.6875            |

## Westernblot of mice liver

## NLRP3

| Control     | ConA        | ConA+Rb1(25 mg/kg) | ConA+Rb1(50 mg/kg) |
|-------------|-------------|--------------------|--------------------|
| 0.275971349 | 0.585928693 | 0.510769059        | 0.415328301        |
| 0.309809656 | 0.655121812 | 0.562332242        | 0.449382341        |
| 0.314218649 | 0.658989983 | 0.565652           | 0.451821547        |

## Cleaved-caspase-1

| Control     | ConA        | ConA+Rb1(25 mg/kg) | ConA+Rb1(50 mg/kg) |
|-------------|-------------|--------------------|--------------------|
| 0.048588571 | 0.079229692 | 0.065259319        | 0.042441296        |
| 0.055212111 | 0.085626563 | 0.069947343        | 0.044730485        |
| 0.043608036 | 0.071723664 | 0.056678356        | 0.035264121        |

## GSDMD-N

| Control     | ConA        | ConA+Rb1(25 mg/kg) | ConA+Rb1(50 mg/kg) |
|-------------|-------------|--------------------|--------------------|
| 0.039361421 | 0.083819576 | 0.064719781        | 0.043066604        |
| 0.044502686 | 0.091742527 | 0.069310992        | 0.046882477        |
| 0.046005385 | 0.099643192 | 0.075089797        | 0.05218456         |

Mature IL-1 $\beta$ 

| Control     | ConA        | ConA+Rb1(25 mg/kg) | ConA+Rb1(50 mg/kg) |
|-------------|-------------|--------------------|--------------------|
| 0.187751758 | 0.469818882 | 0.401456753        | 0.203611448        |
| 0.161615427 | 0.410809381 | 0.340007479        | 0.177391763        |
| 0.20747604  | 0.514475016 | 0.419276648        | 0.218764315        |

## Mature IL-18

| Control     | ConA        | ConA+Rb1(25 mg/kg) | ConA+Rb1(50 mg/kg) |
|-------------|-------------|--------------------|--------------------|
| 0.05457525  | 0.095408877 | 0.063479463        | 0.042863084        |
| 0.063321454 | 0.109712014 | 0.070628932        | 0.048389731        |
| 0.072874131 | 0.126358918 | 0.082677046        | 0.056339043        |

## p62

| Control     | ConA        | ConA+Rb1(25 mg/kg) | ConA+Rb1(50 mg/kg) |
|-------------|-------------|--------------------|--------------------|
| 0.246472818 | 0.359427017 | 0.299286046        | 0.245038041        |
| 0.244364019 | 0.363918767 | 0.297009885        | 0.243686408        |
| 0.259048008 | 0.3832284   | 0.315178713        | 0.256955616        |

## LC3

| Control     | ConA        | ConA+Rb1(25 mg/kg) | ConA+Rb1(50 mg/kg) |
|-------------|-------------|--------------------|--------------------|
| 0.373507118 | 0.537836428 | 0.73919244         | 0.795456374        |
| 0.402477495 | 0.587718863 | 0.802962735        | 0.86783141         |
| 0.384922877 | 0.56479753  | 0.769440319        | 0.826080754        |

## PINK1

| Control     | ConA        | ConA+Rb1(25 mg/kg) | ConA+Rb1(50 mg/kg) |
|-------------|-------------|--------------------|--------------------|
| 0.395540728 | 0.617571037 | 0.609599971        | 0.824098975        |
| 0.450135753 | 0.707547931 | 0.699430679        | 0.938808359        |
| 0.435672286 | 0.68583844  | 0.677615902        | 0.914028399        |

| Parkin              |             |             |                    |                    |
|---------------------|-------------|-------------|--------------------|--------------------|
|                     | Control     | ConA        | ConA+Rb1(25 mg/kg) | ConA+Rb1(50 mg/kg) |
|                     | 0.223990679 | 0.272749918 | 0.325045553        | 0.36965591         |
|                     | 0.227720349 | 0.278272932 | 0.331392586        | 0.37913198         |
|                     | 0.228453461 | 0.279503897 | 0.334383592        | 0.37974964         |
| CsA added in mice   |             |             |                    |                    |
| NLRP3               |             |             |                    |                    |
|                     | Control     | ConA        | ConA+Rb1           | ConA+Rb1+CsA       |
|                     | 0.86280406  | 1.55722771  | 1.142470768        | 1.301777093        |
|                     | 0.898722255 | 1.614650133 | 1.179941353        | 1.3253101          |
|                     | 0.855738862 | 1.565830287 | 1.121121965        | 1.288825993        |
| Cleaved-caspase-1   |             |             |                    |                    |
|                     | Control     | ConA        | ConA+Rb1           | ConA+Rb1+CsA       |
|                     | 0.932826633 | 1.629996997 | 1.096305428        | 1.428974983        |
|                     | 0.939021646 | 1.634189548 | 1.09970044         | 1.389364704        |
|                     | 1.06574659  | 1.779111655 | 1.190353836        | 1.561894831        |
| GSDMD-N             |             |             |                    |                    |
|                     | Control     | ConA        | ConA+Rb1           | ConA+Rb1+CsA       |
|                     | 0.899456994 | 1.900802523 | 1.231551421        | 1.582183688        |
|                     | 0.923018579 | 2.035890168 | 1.326219777        | 1.667470631        |
|                     | 0.926466635 | 2.044864174 | 1.312828141        | 1.663190824        |
| Mature IL-1 $\beta$ |             |             |                    |                    |
|                     | Control     | ConA        | ConA+Rb1           | ConA+Rb1+CsA       |
|                     | 0.812544396 | 1.64413708  | 0.901752027        | 1.292034775        |
|                     | 0.731156805 | 1.468228521 | 0.817956196        | 1.142572357        |
|                     | 0.681708219 | 1.401891464 | 0.776259268        | 1.078769221        |
| Mature IL-18        |             |             |                    |                    |
|                     | Control     | ConA        | ConA+Rb1           | ConA+Rb1+CsA       |
|                     | 0.509913024 | 0.831820609 | 0.353565692        | 0.51226593         |
|                     | 0.378297507 | 0.67340124  | 0.280550747        | 0.430891908        |
|                     | 0.386507963 | 0.657417919 | 0.277667292        | 0.423812834        |
| p62                 |             |             |                    |                    |
|                     | Control     | ConA        | ConA+Rb1           | ConA+Rb1+CsA       |
|                     | 0.296207691 | 0.399022158 | 0.186248605        | 0.325207108        |
|                     | 0.260686899 | 0.34953763  | 0.158090714        | 0.277409432        |
|                     | 0.253436957 | 0.351040014 | 0.154054857        | 0.279317496        |
| LC3                 |             |             |                    |                    |
|                     | Control     | ConA        | ConA+Rb1           | ConA+Rb1+CsA       |
|                     | 0.301630134 | 0.4856502   | 0.676660838        | 0.438891211        |
|                     | 0.312426347 | 0.498459657 | 0.704202602        | 0.435504524        |

|        |             |             |             |              |
|--------|-------------|-------------|-------------|--------------|
|        | 0.293901562 | 0.46692653  | 0.655634265 | 0.416866959  |
| PINK1  | Control     | ConA        | ConA+Rb1    | ConA+Rb1+CsA |
|        | 0.192313906 | 0.319593518 | 0.434759541 | 0.227954967  |
|        | 0.195170546 | 0.311189241 | 0.450204796 | 0.223584978  |
|        | 0.175793177 | 0.29653066  | 0.390645524 | 0.203581993  |
| Parkin | Control     | ConA        | ConA+Rb1    | ConA+Rb1+CsA |
|        | 0.247156264 | 0.34317989  | 0.535260557 | 0.340154755  |
|        | 0.22457151  | 0.311496241 | 0.481880302 | 0.299353324  |
|        | 0.229393838 | 0.320106758 | 0.487461166 | 0.309503945  |

Westernblot of HepG2 cell

NLRP3

| Control     | ConA        | ConA+Rb1(6.25 $\mu$ M) | ConA+Rb1(12.5 $\mu$ M) |
|-------------|-------------|------------------------|------------------------|
| 0.289044496 | 0.758134108 | 0.625369371            | 0.394261875            |
| 0.29293883  | 0.758899218 | 0.630670496            | 0.395314249            |
| 0.288708729 | 0.746489748 | 0.619967273            | 0.391182606            |

Cleaved-caspase-1

| Control     | ConA        | ConA+Rb1(6.25 $\mu$ M) | ConA+Rb1(12.5 $\mu$ M) |
|-------------|-------------|------------------------|------------------------|
| 0.144474896 | 0.241506046 | 0.167435354            | 0.092165985            |
| 0.179368929 | 0.270363655 | 0.186489705            | 0.100759481            |
| 0.174808799 | 0.276757048 | 0.194624036            | 0.104971664            |

GSDMD-N

| Control     | ConA        | ConA+Rb1(6.25 $\mu$ M) | ConA+Rb1(12.5 $\mu$ M) |
|-------------|-------------|------------------------|------------------------|
| 0.184884705 | 0.273647693 | 0.223253079            | 0.192243571            |
| 0.182726607 | 0.299448352 | 0.244644676            | 0.18274804             |
| 0.156499405 | 0.256455405 | 0.211278774            | 0.156465525            |

Mature IL-1 $\beta$

| Control     | ConA        | ConA+Rb1(6.25 $\mu$ M) | ConA+Rb1(12.5 $\mu$ M) |
|-------------|-------------|------------------------|------------------------|
| 0.093641934 | 0.245586637 | 0.145408216            | 0.090391446            |
| 0.111721743 | 0.293233135 | 0.177137749            | 0.107991871            |
| 0.102460863 | 0.257674692 | 0.153590064            | 0.094498927            |

Mature IL-18

| Control     | ConA        | ConA+Rb1(6.25 $\mu$ M) | ConA+Rb1(12.5 $\mu$ M) |
|-------------|-------------|------------------------|------------------------|
| 0.210833537 | 0.431340901 | 0.227164329            | 0.117785396            |
| 0.210911618 | 0.437093141 | 0.224233667            | 0.114831506            |
| 0.257007512 | 0.525227686 | 0.270555843            | 0.147853746            |

p62

| Control     | ConA        | ConA+Rb1(6.25 $\mu$ M) | ConA+Rb1(12.5 $\mu$ M) |
|-------------|-------------|------------------------|------------------------|
| 0.123342846 | 0.215495287 | 0.127376396            | 0.111067417            |
| 0.132537469 | 0.239177905 | 0.145660449            | 0.126267328            |
| 0.117032044 | 0.203235892 | 0.116539167            | 0.102141223            |

LC3

| Control     | ConA        | ConA+Rb1(6.25 $\mu$ M) | ConA+Rb1(12.5 $\mu$ M) |
|-------------|-------------|------------------------|------------------------|
| 0.395717057 | 0.518438895 | 0.644946497            | 0.747072878            |
| 0.425559512 | 0.564869069 | 0.70584377             | 0.803968245            |
| 0.475982311 | 0.616853202 | 0.772989593            | 0.875443274            |

PINK1

| Control     | ConA        | ConA+Rb1(6.25 $\mu$ M) | ConA+Rb1(12.5 $\mu$ M) |
|-------------|-------------|------------------------|------------------------|
| 0.195776103 | 0.232769969 | 0.422014372            | 0.479309808            |
| 0.209059477 | 0.253475664 | 0.458696744            | 0.511664722            |
| 0.213095545 | 0.259317544 | 0.464696624            | 0.522760861            |



Parkin

| Control     | ConA        | ConA+Rb1(6.25 $\mu$ M) | ConA+Rb1(12.5 $\mu$ M) |
|-------------|-------------|------------------------|------------------------|
| 0.598891482 | 0.808020506 | 1.115898618            | 1.416022378            |
| 0.55725188  | 0.78361455  | 1.077500426            | 1.357271645            |
| 0.507703582 | 0.716278378 | 0.987424913            | 1.247365436            |

CsA added in HepG2 cells

NLRP3

| Control     | ConA        | ConA+Rb1    | ConA+Rb1+CsA |
|-------------|-------------|-------------|--------------|
| 0.103378706 | 0.18719783  | 0.089201443 | 0.147696987  |
| 0.08692038  | 0.159181469 | 0.073358475 | 0.12445902   |
| 0.090273075 | 0.166912429 | 0.077309327 | 0.129772562  |

Cleaved-caspase-1

| Control     | ConA        | ConA+Rb1    | ConA+Rb1+CsA |
|-------------|-------------|-------------|--------------|
| 0.425118654 | 0.693663333 | 0.369919969 | 0.457452333  |
| 0.354050388 | 0.569220715 | 0.307152451 | 0.394638843  |
| 0.379437747 | 0.609706281 | 0.325361671 | 0.41559838   |

GSDMD-N

| Control     | ConA        | ConA+Rb1    | ConA+Rb1+CsA |
|-------------|-------------|-------------|--------------|
| 0.103378706 | 0.18719783  | 0.089201443 | 0.147696987  |
| 0.08692038  | 0.159181469 | 0.073358475 | 0.12445902   |
| 0.090273075 | 0.166912429 | 0.077309327 | 0.129772562  |

Mature IL-1 $\beta$

| Control     | ConA        | ConA+Rb1    | ConA+Rb1+CsA |
|-------------|-------------|-------------|--------------|
| 0.111389233 | 0.207269029 | 0.129794018 | 0.189731035  |
| 0.085142221 | 0.159118115 | 0.097494446 | 0.146377808  |
| 0.070173906 | 0.128038817 | 0.078436547 | 0.118133929  |

Mature IL-18

| Control     | ConA        | ConA+Rb1    | ConA+Rb1+CsA |
|-------------|-------------|-------------|--------------|
| 0.064068545 | 0.183149686 | 0.114510892 | 0.155521124  |
| 0.062338669 | 0.179364661 | 0.10982332  | 0.148530547  |
| 0.055872633 | 0.164122695 | 0.100217502 | 0.134176294  |

p62

| Control     | ConA        | ConA+Rb1    | ConA+Rb1+CsA |
|-------------|-------------|-------------|--------------|
| 0.16481415  | 0.217098422 | 0.140019499 | 0.194652579  |
| 0.177971958 | 0.227500852 | 0.152614801 | 0.20884274   |
| 0.16721002  | 0.204212053 | 0.134296431 | 0.187797246  |

LC3

| Control     | ConA        | ConA+Rb1    | ConA+Rb1+CsA |
|-------------|-------------|-------------|--------------|
| 0.515242603 | 0.697513461 | 0.835124504 | 0.675263769  |
| 0.524720866 | 0.697275788 | 0.846936282 | 0.678746293  |

|        |             |             |             |              |
|--------|-------------|-------------|-------------|--------------|
|        | 0.522267839 | 0.697532055 | 0.853430675 | 0.680443755  |
| PINK1  | Control     | ConA        | ConA+Rb1    | ConA+Rb1+CsA |
|        | 1.132629714 | 2.121790724 | 2.907243876 | 2.035401179  |
|        | 1.189651332 | 2.173750079 | 3.039419476 | 2.122725526  |
|        | 0.960606394 | 1.764115697 | 2.48006515  | 1.688203971  |
| Parkin | Control     | ConA        | ConA+Rb1    | ConA+Rb1+CsA |
|        | 0.454631104 | 0.595561898 | 0.968509761 | 0.651148431  |
|        | 0.485753448 | 0.628919267 | 1.028423846 | 0.690819352  |
|        | 0.49865368  | 0.645635638 | 1.059752936 | 0.713750306  |

ROS in HepG2 cells

| Control | ConA   | ConA+Rb1(6.25 $\mu$ M) | ConA+Rb1(12.5 $\mu$ M) |
|---------|--------|------------------------|------------------------|
| 14.773  | 56.169 | 42.511                 | 34.35                  |
| 16.803  | 56.48  | 42.89                  | 35.921                 |
| 14.538  | 58.287 | 43.572                 | 37.226                 |

CsA added in HepG2 cells

| Control | ConA   | ConA+Rb1 | ConA+Rb1+CsA |
|---------|--------|----------|--------------|
| 12.892  | 46.659 | 27.261   | 39.729       |
| 14.666  | 49.298 | 28.219   | 40.354       |
| 12.565  | 44.266 | 29.175   | 43.795       |

mitochondria ROS in HepG2 cells

| Control | ConA   | ConA+Rb1(6.25 $\mu$ M) | ConA+Rb1(12.5 $\mu$ M) |
|---------|--------|------------------------|------------------------|
| 62.259  | 92.238 | 80.73                  | 76.181                 |
| 63.56   | 94.062 | 81.859                 | 77.811                 |
| 64.25   | 94.705 | 82.614                 | 79.17                  |

CsA added in HepG2 cells

| Control | ConA   | ConA+Rb1 | ConA+Rb1+CsA |
|---------|--------|----------|--------------|
| 19.445  | 44.753 | 29.41    | 45.528       |
| 19.587  | 45.644 | 29.867   | 46.009       |
| 19.153  | 48.254 | 30.897   | 47.334       |

LDH in HepG2 cells

| Control     | ConA        | ConA+Rb1(6.25 $\mu$ M) | ConA+Rb1(12.5 $\mu$ M) |
|-------------|-------------|------------------------|------------------------|
| 2.936857562 | 17.71904063 | 14.14586393            | 8.027410671            |
| 3.915810083 | 18.45325502 | 14.53744493            | 9.300048948            |
| 2.398433676 | 18.94273128 | 13.99902105            | 9.006363191            |

CsA added in HepG2 cells

| Control     | ConA        | ConA+Rb1    | ConA+Rb1+CsA |
|-------------|-------------|-------------|--------------|
| 5.117679256 | 25.06841817 | 8.894362343 | 20.88122605  |
| 1.833607006 | 23.91899288 | 12.67104543 | 19.89600438  |
| 5.856595512 | 23.59058566 | 12.2605364  | 22.52326218  |

MMP(CsA added) in HepG2  
cells

| Control     | ConA        | ConA+Rb1    | ConA+Rb1+CsA |
|-------------|-------------|-------------|--------------|
| 1.696968987 | 0.845409244 | 1.345583684 | 1.0082369    |
| 1.694310265 | 0.852437772 | 1.32653159  | 0.980346908  |
| 1.699162097 | 0.861758562 | 1.359349109 | 0.9732291    |

Co-location of PINK1 and LC3 in  
HepG2 cells

| Control | ConA   | ConA+Rb1 | ConA+Rb1+CsA |
|---------|--------|----------|--------------|
| 0.0395  | 0.1949 | 0.4833   | 0.2571       |
| 0.0336  | 0.1733 | 0.4863   | 0.2517       |
| 0.0335  | 0.2044 | 0.4961   | 0.28         |

Co-location of mitochondria and autophagosomes in mice

| Control | ConA   | ConA+Rb1 | ConA+Rb1+CsA |
|---------|--------|----------|--------------|
| 0.478   | 0.5857 | 0.8822   | 0.5116       |
| 0.4564  | 0.5783 | 0.8774   | 0.5001       |
| 0.5112  | 0.6165 | 0.8969   | 0.5126       |
