# Supplementary material for: Ginsenoside Rb1 alleviated concanavalin A-induced hepatocyte pyroptosis by activating mitophagy
Source: Royal Society of Chemistry journal article supplement (doi:10.1039/d2fo03130b), 2023-01-01
Supplement: d2fo03130b2.pdf [file d2fo03130b2.pdf]

Dear Editor,

We have provided all Western blot data by the underlying raw images below.  
And all samples and controls used for a comparative analysis were run on the same blot.  
Thank you very much for your attention and consideration. We are looking forward to your response.

Yours sincerely,

Prof Shuang Guan

**Fig 1 Western blot data**

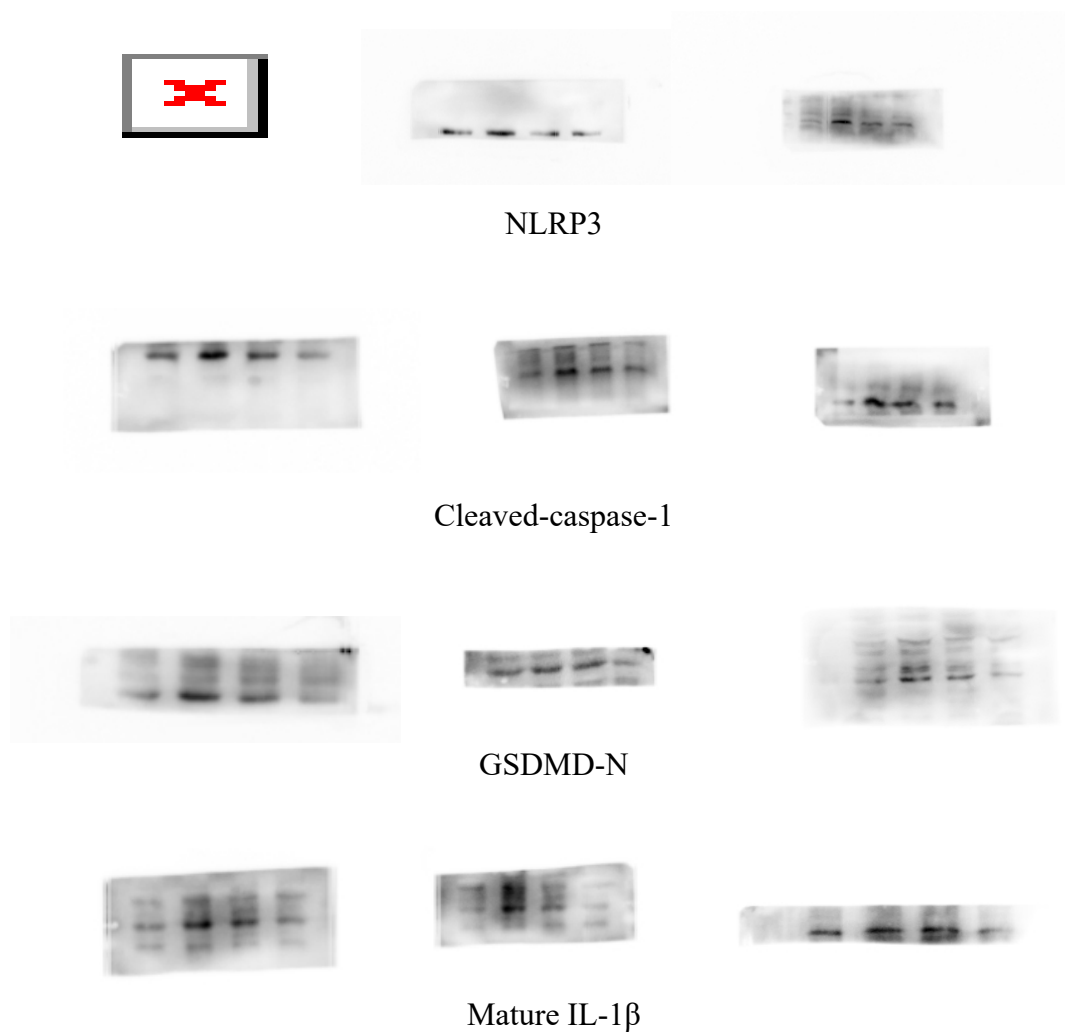

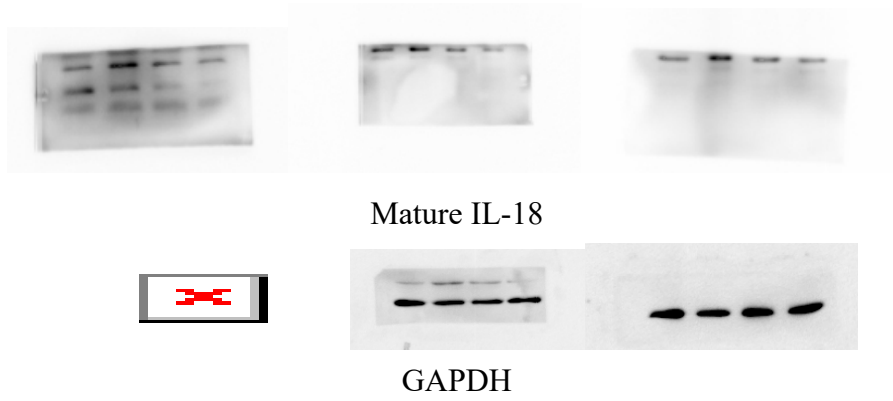

**Fig 2 Western blot data**

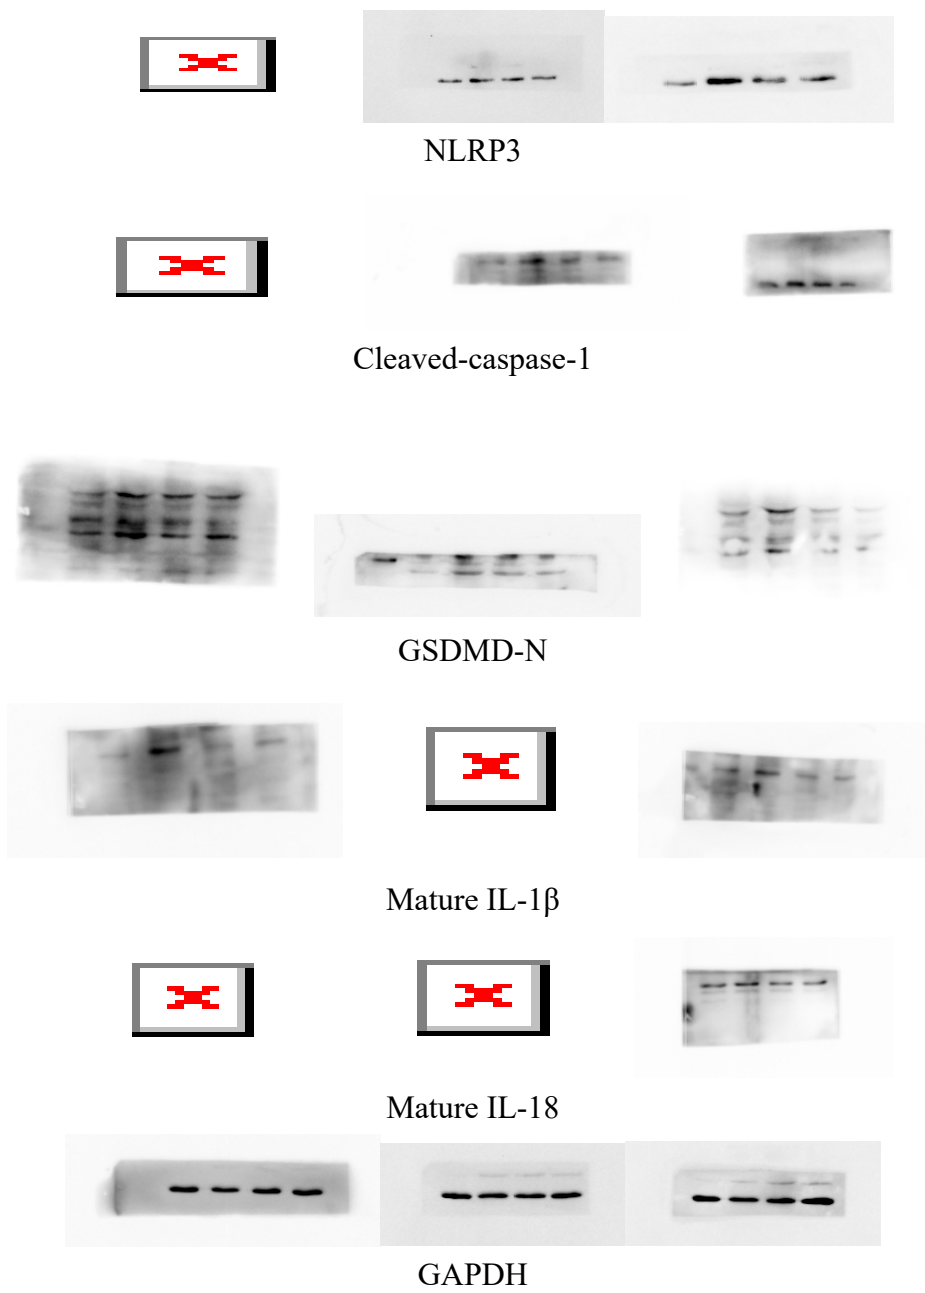

**Fig 3 Western blot data**

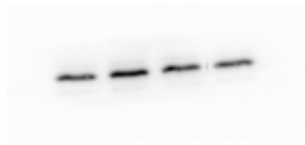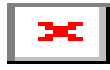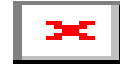

p62(mice)

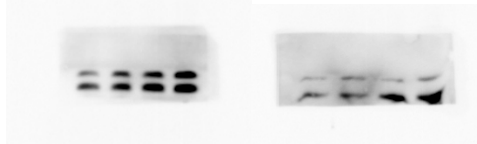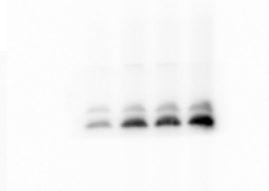

LC3(mice)

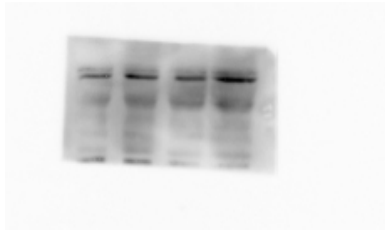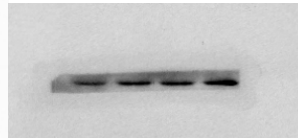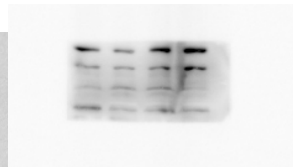

PINK1(mice)

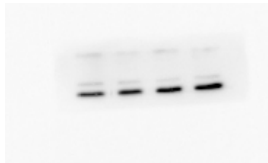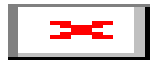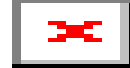

Parkin(mice)

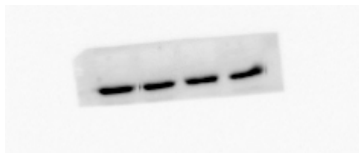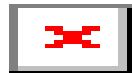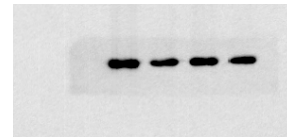

GAPDH(mice)

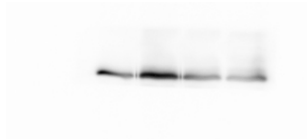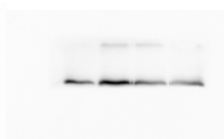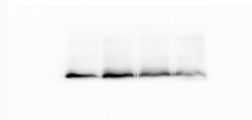

p62(HepG2 cells)

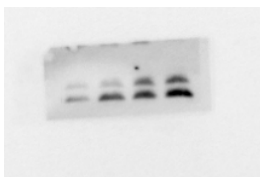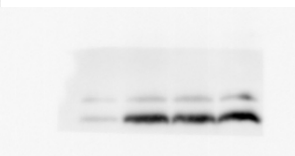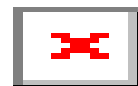

LC3(HepG2 cells)

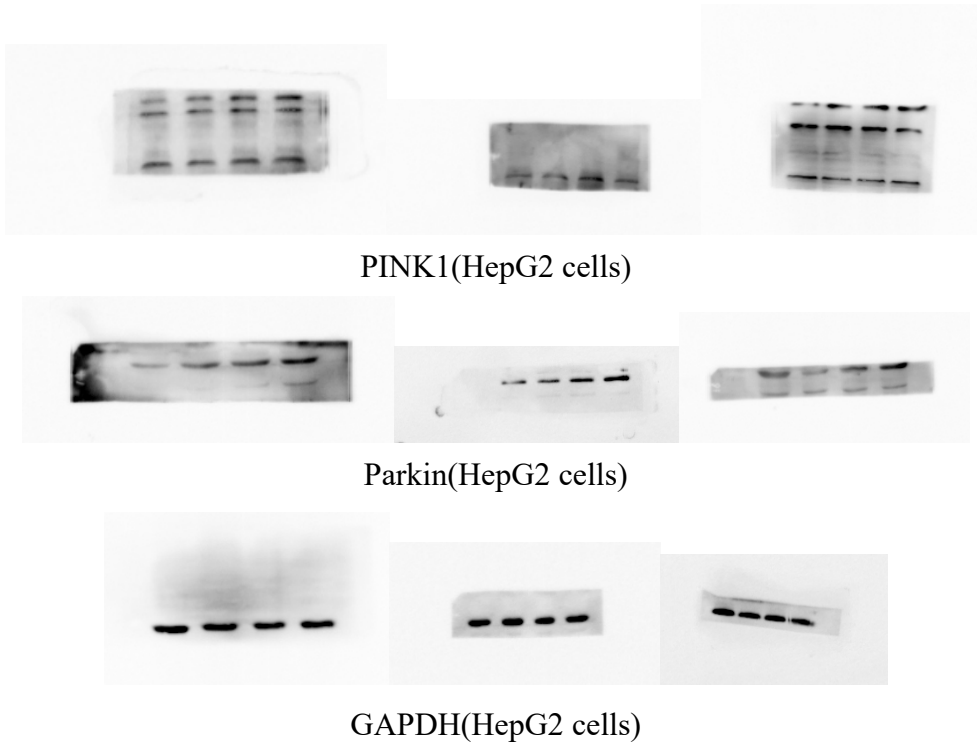

**Fig 4 Western blot data**

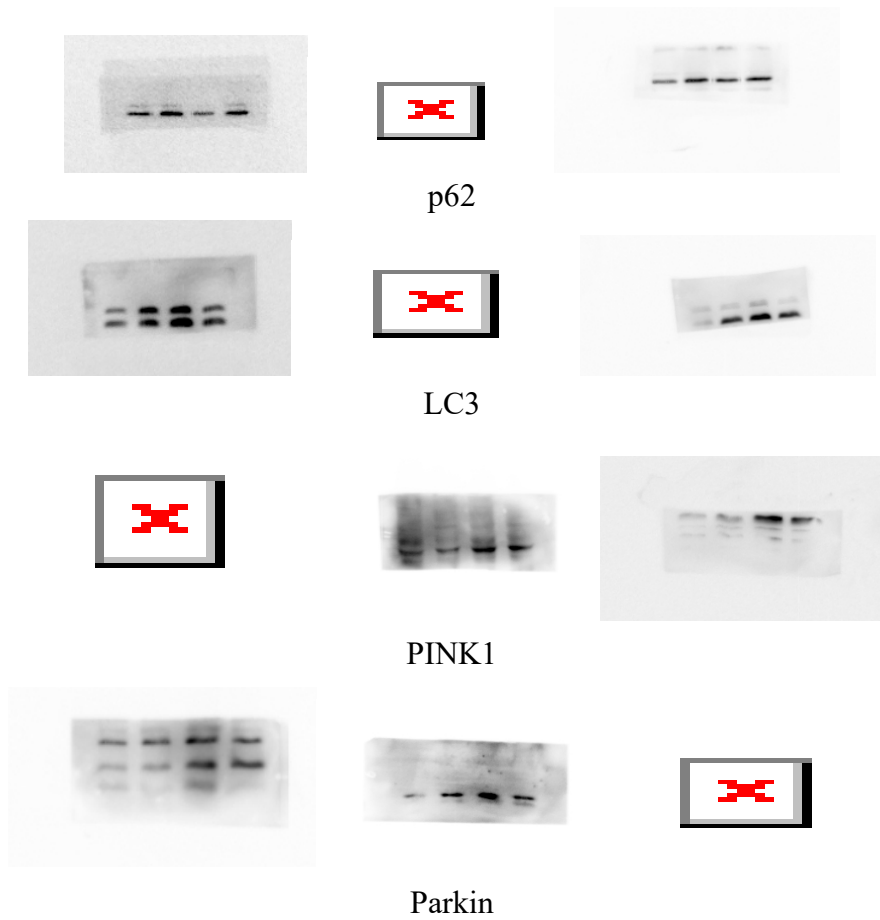

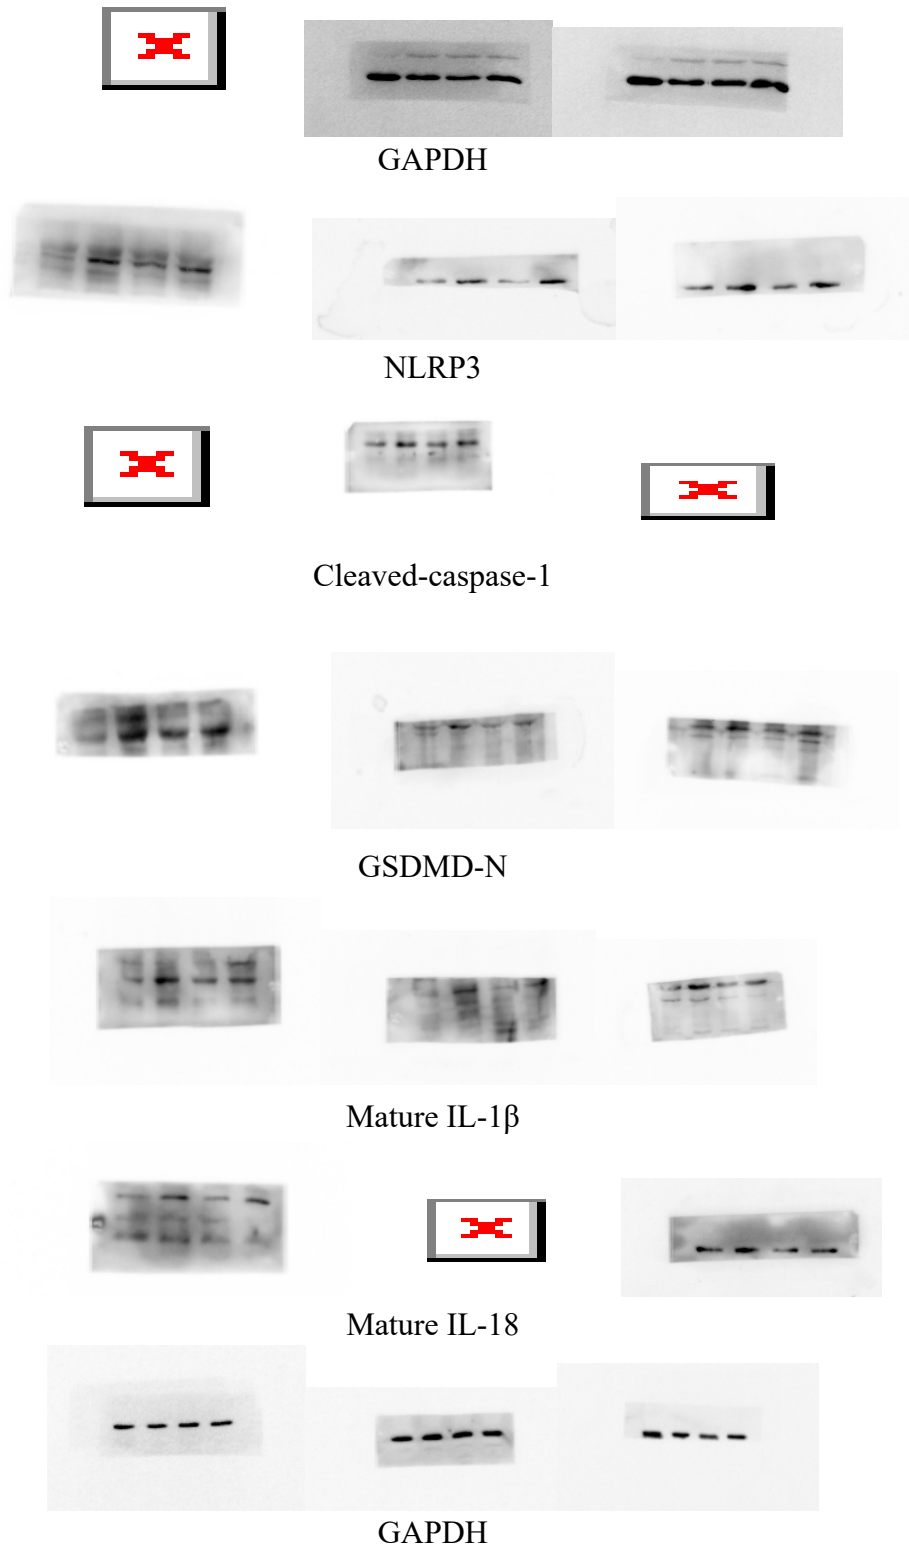

**Fig 6 Western blot data**

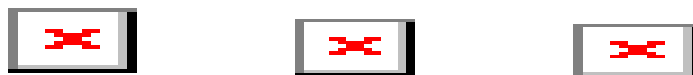

p62

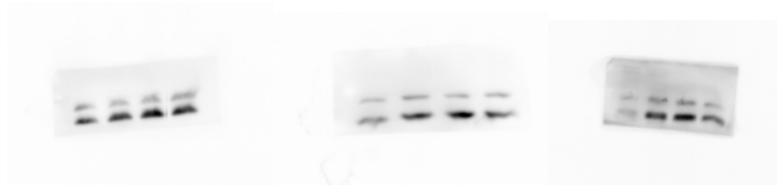

LC3

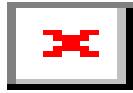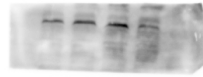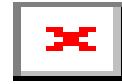

PINK1

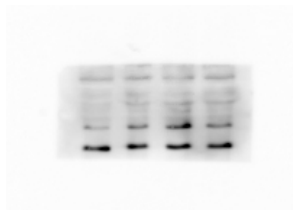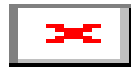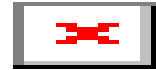

Parkin

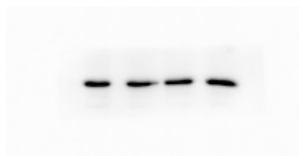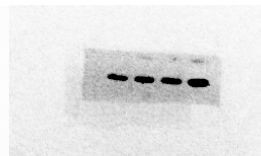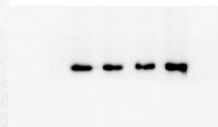

GAPDH

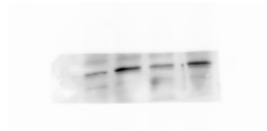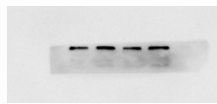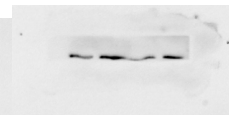

NLRP3

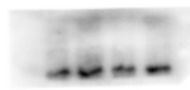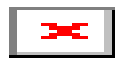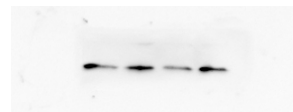

Cleaved-caspase-1

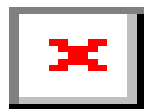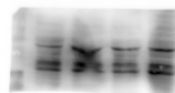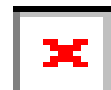

GSDMD-N

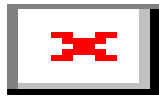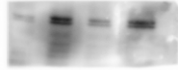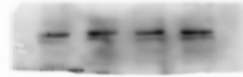

Mature IL-1 $\beta$

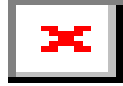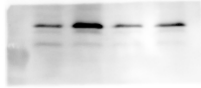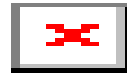

Mature IL-18

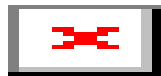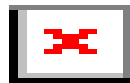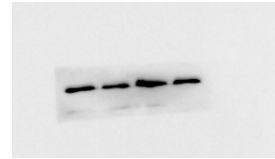

GAPDH
